# Supplementary material for: Plants as Biofactories for Therapeutic Proteins and Antiviral Compounds to Combat COVID-19
Source: MDPI journal article supplement (doi:10.3390/life13030617), 2023-02-23
Supplement: s1 [file s1]

**Supplementary Table S1.** Subunit vaccines and virus-like particle vaccines against COVID-19 that have reached or passed Phase I human trials according to the COVID-19 vaccine tracker website

| Drug Name                                 | Drug Type           | Manufacturer                                     | Approved for use? | Furthest Development Stage | Plant Based?       | Link                                                                                                          |
|-------------------------------------------|---------------------|--------------------------------------------------|-------------------|----------------------------|--------------------|---------------------------------------------------------------------------------------------------------------|
| Zifivax                                   | Subunit             | Anhui Zhifei Longcom                             | Yes               | Complete                   | No - CHO cells     | <a href="https://covid19.trackvaccines.org/vaccines/27/">https://covid19.trackvaccines.org/vaccines/27/</a>   |
| Noora vaccine                             | Subunit             | Bagheiat-allah University of Medical Sciences    | Yes               | Complete                   | No - E. coli cells | <a href="https://covid19.trackvaccines.org/vaccines/129/">https://covid19.trackvaccines.org/vaccines/129/</a> |
| Corbbevax                                 | Subunit             | Biological E Limited                             | Yes               | Complete                   | No - Yeast         | <a href="https://covid19.trackvaccines.org/vaccines/54/">https://covid19.trackvaccines.org/vaccines/54/</a>   |
| Abdala                                    | Subunit             | Center for Genetic Engineering and Biotechnology | Yes               | Complete                   | No - Yeast         | <a href="https://covid19.trackvaccines.org/vaccines/67/">https://covid19.trackvaccines.org/vaccines/67/</a>   |
| Soberana 02                               | Subunit             | Instituto Finlay do Vacunas Cuba                 | Yes               | Complete                   | No - CHO cells     | <a href="https://covid19.trackvaccines.org/vaccines/52/">https://covid19.trackvaccines.org/vaccines/52/</a>   |
| Soberana Plus                             | Subunit             | Instituto Finlay do Vacunas Cuba                 | Yes               | Complete                   | No - CHO cells     | <a href="https://covid19.trackvaccines.org/vaccines/119/">https://covid19.trackvaccines.org/vaccines/119/</a> |
| Covifenz                                  | Virus-like Particle | Medicago                                         | Yes               | Complete                   | Yes                | <a href="https://covid19.trackvaccines.org/vaccines/26/">https://covid19.trackvaccines.org/vaccines/26/</a>   |
| MVC-COV1901                               | Subunit             | Medigen                                          | Yes               | Complete                   | No - CHO cells     | <a href="https://covid19.trackvaccines.org/vaccines/24/">https://covid19.trackvaccines.org/vaccines/24/</a>   |
| Recombinant SARS-CoV-2 Vaccine (CHO cell) | Subunit             | National Vaccine and Serum Institute             | Yes               | Complete                   | No - CHO cells     | <a href="https://covid19.trackvaccines.org/vaccines/114/">https://covid19.trackvaccines.org/vaccines/114/</a> |
| Nuvaxoid                                  | Subunit             | Novavax                                          | Yes               | Complete                   | No - Sf9 cells     | <a href="https://covid19.trackvaccines.org/vaccines/25/">https://covid19.trackvaccines.org/vaccines/25/</a>   |
| Razi Cov Pars                             | Subunit             | Razi Vaccine and Serum Research Institute        | Yes               | Complete                   | No - CHO cells     | <a href="https://covid19.trackvaccines.org/vaccines/82/">https://covid19.trackvaccines.org/vaccines/82/</a>   |
| COVOVAX (Novavax formulation)             | Subunit             | Serum Institute of India                         | Yes               | Complete                   | No - Sf9           | <a href="https://covid19.trackvaccines.org/vaccines/123/">https://covid19.trackvaccines.org/vaccines/123/</a> |
| SKYCovione                                | Subunit             | SK Biosciences Co Ltd                            | Yes               | Complete                   | No - HEK293 cells  | <a href="https://covid19.trackvaccines.org/vaccines/81/">https://covid19.trackvaccines.org/vaccines/81/</a>   |
| TAK-019 (Moderna formulation)             | Subunit             | Takeda                                           | Yes               | Complete                   | No - Sf9 cells     | <a href="https://covid19.trackvaccines.org/vaccines/80/">https://covid19.trackvaccines.org/vaccines/80/</a>   |
| SpikoGen                                  | Subunit             | Vaxine/CinnaGen Co.                              | Yes               | Complete                   | No - Sf9 cells     | <a href="https://covid19.trackvaccines.org/vaccines/8/">https://covid19.trackvaccines.org/vaccines/8/</a>     |

|                                                                                                |         |                                                                     |     |                    |                                |                                                                                                               |
|------------------------------------------------------------------------------------------------|---------|---------------------------------------------------------------------|-----|--------------------|--------------------------------|---------------------------------------------------------------------------------------------------------------|
| Aurora-CoV<br>(aka<br>EpiVacCorona-<br>N)                                                      | Subunit | Vector State<br>Research Center of<br>Virology and<br>Biotechnology | Yes | Complete           | No - Chemically<br>Synthesized | <a href="https://covid19.trackvaccines.org/vaccines/169/">https://covid19.trackvaccines.org/vaccines/169/</a> |
| EpiVacCorona                                                                                   | Subunit | Vector State<br>Research Center of<br>Virology and<br>Biotechnology | Yes | Complete           | No - Chemically<br>Synthesized | <a href="https://covid19.trackvaccines.org/vaccines/32/">https://covid19.trackvaccines.org/vaccines/32/</a>   |
| Bivalent SARS-<br>CoV-2 rS<br>Vaccine                                                          | Subunit | Novavax                                                             | No  | Phase 3            | No - Sf9 cells                 | <a href="https://covid19.trackvaccines.org/vaccines/204/">https://covid19.trackvaccines.org/vaccines/204/</a> |
| ReCOV                                                                                          | Subunit | Jiangsu Rec-<br>Biotechnology Co<br>Ltd                             | No  | Phase 3            | No - CHO cells                 | <a href="https://covid19.trackvaccines.org/vaccines/102/">https://covid19.trackvaccines.org/vaccines/102/</a> |
| SP/GSK subunit<br>D614 Vaccine                                                                 | Subunit | Sanofi/GSK                                                          | No  | Phase 3            | No - Sf9                       | <a href="https://covid19.trackvaccines.org/vaccines/164/">https://covid19.trackvaccines.org/vaccines/164/</a> |
| SP/GSK subunit<br>B.1.351 vaccine                                                              | Subunit | Sanofi/GSK                                                          | No  | Phase 3            | No - Sf9                       | <a href="https://covid19.trackvaccines.org/vaccines/165/">https://covid19.trackvaccines.org/vaccines/165/</a> |
| Recombinant<br>Protein                                                                         | Subunit | Sanofi/GSK                                                          | No  | Phase 3            | No - Sf9                       | <a href="https://covid19.trackvaccines.org/vaccines/34/">https://covid19.trackvaccines.org/vaccines/34/</a>   |
| SARS-CoV-2<br>Protein Subunit<br>Recombinant<br>Vaccine<br>Adjuvanted<br>With<br>Alum+CpG 1018 | Subunit | PT Bio Pharma                                                       | No  | Phase 3            | Awaiting reply                 | <a href="https://covid19.trackvaccines.org/vaccines/187/">https://covid19.trackvaccines.org/vaccines/187/</a> |
| Nanocovax                                                                                      | Subunit | Nanogen                                                             | No  | Phase 3            | No - CHO cells                 | <a href="https://covid19.trackvaccines.org/vaccines/72/">https://covid19.trackvaccines.org/vaccines/72/</a>   |
| COVID-19<br>vaccine HIPRA                                                                      | Subunit | Laboratorios Hipra<br>SA                                            | No  | Phase 3            | No - CHO cells                 | <a href="https://covid19.trackvaccines.org/vaccines/139/">https://covid19.trackvaccines.org/vaccines/139/</a> |
| V-01                                                                                           | Subunit | Livzon Mabpharm<br>Inc                                              | No  | Complete/Phase 1-3 | No - CHO cells                 | <a href="https://covid19.trackvaccines.org/vaccines/108/">https://covid19.trackvaccines.org/vaccines/108/</a> |
| SARS-CoV-2<br>Protein Subunit<br>Recombinant<br>Vaccine                                        | Subunit | PT BioPharma                                                        | No  | Phase 3            | Awaiting reply                 | <a href="https://covid19.trackvaccines.org/vaccines/154/">https://covid19.trackvaccines.org/vaccines/154/</a> |
| NVX-CoV2515                                                                                    | Subunit | Novavax                                                             | No  | Phase 3            | No - Sf9                       | <a href="https://covid19.trackvaccines.org/vaccines/202/">https://covid19.trackvaccines.org/vaccines/202/</a> |
| S-268019                                                                                       | Subunit | Shionogi                                                            | No  | Phase 3            | No - BEVS                      | <a href="https://covid19.trackvaccines.org/vaccines/73/">https://covid19.trackvaccines.org/vaccines/73/</a>   |

|                                                       |                     |                                     |    |         |                   |                                                                                                               |
|-------------------------------------------------------|---------------------|-------------------------------------|----|---------|-------------------|---------------------------------------------------------------------------------------------------------------|
| SCTV01C                                               | Subunit             | Sinocelltech                        | No | Phase 3 | No - CHO cells    | <a href="https://covid19.trackvaccines.org/vaccines/149/">https://covid19.trackvaccines.org/vaccines/149/</a> |
| UB-612                                                | Subunit             | COVAXX                              | No | Phase 3 | No - CHO cells    | <a href="https://covid19.trackvaccines.org/vaccines/43/">https://covid19.trackvaccines.org/vaccines/43/</a>   |
| PIKA COVID-19 Vaccine                                 | Subunit             | Yisheng Biopharma                   | No | Phase 3 | No - Sf9          | <a href="https://covid19.trackvaccines.org/vaccines/155/">https://covid19.trackvaccines.org/vaccines/155/</a> |
| Recombinant (Sf9 cell)                                | Subunit             | West China Hospital                 | No | Phase 3 | No - Sf9          | <a href="https://covid19.trackvaccines.org/vaccines/33/">https://covid19.trackvaccines.org/vaccines/33/</a>   |
| AKS-452                                               | Subunit             | University Medical Center Groningen | No | Phase 3 | No - CHO cells    | <a href="https://covid19.trackvaccines.org/vaccines/76/">https://covid19.trackvaccines.org/vaccines/76/</a>   |
| SCTV01E                                               | Subunit             | Sinocelltech                        | No | Phase 3 | Awaiting response | <a href="https://covid19.trackvaccines.org/vaccines/184/">https://covid19.trackvaccines.org/vaccines/184/</a> |
| SCB-2019                                              | Subunit             | Clover                              | No | Phase 3 | No - CHO cells    | <a href="https://covid19.trackvaccines.org/vaccines/28/">https://covid19.trackvaccines.org/vaccines/28/</a>   |
| ABNCoV2                                               | Virus-like Particle | Radboud University                  | No | Phase 3 | No- Drosophila    | <a href="https://covid19.trackvaccines.org/vaccines/110/">https://covid19.trackvaccines.org/vaccines/110/</a> |
| LYB001                                                | Virus-like Particle | Yantai Patronus Biotech Co Ltd      | No | Phase 3 | No - CHO cells    | <a href="https://covid19.trackvaccines.org/vaccines/163/">https://covid19.trackvaccines.org/vaccines/163/</a> |
| AdimrSC-2f                                            | Subunit             | Adimmune Corporation                | No | Phase 2 | No - Baculovirus  | <a href="https://covid19.trackvaccines.org/vaccines/63/">https://covid19.trackvaccines.org/vaccines/63/</a>   |
| SII B.1.617.2                                         | Subunit             | Novavax                             | No | Phase 2 | No - Baculovirus  | <a href="https://covid19.trackvaccines.org/vaccines/146/">https://covid19.trackvaccines.org/vaccines/146/</a> |
| Soberana 01 (aka FINLAY-FR-1)                         | Subunit             | Instituto Finlay de Vacunas Cuba    | No | Phase 2 | No - CHO cells    | <a href="https://covid19.trackvaccines.org/vaccines/35/">https://covid19.trackvaccines.org/vaccines/35/</a>   |
| KBP-201                                               | Subunit             | Kentucky Bioprocessing              | No | Phase 2 | Yes               | <a href="https://covid19.trackvaccines.org/vaccines/18/">https://covid19.trackvaccines.org/vaccines/18/</a>   |
| V-01-351/V-01D (aka V-01-351/V-01D Bivalence Vaccine) | Subunit             | Livzon Pharmaceutical Group Inc     | No | Phase 2 | No - CHO cells    | <a href="https://covid19.trackvaccines.org/vaccines/195/">https://covid19.trackvaccines.org/vaccines/195/</a> |
| MVC-COV1901(Beta)                                     | Subunit             | Medigen                             | No | Phase 2 | No - CHO cells    | <a href="https://covid19.trackvaccines.org/vaccines/180/">https://covid19.trackvaccines.org/vaccines/180/</a> |
| ICC Vaccine                                           | Subunit             | Novavax                             | No | Phase 2 | No - Baculovirus  | <a href="https://covid19.trackvaccines.org/vaccines/136/">https://covid19.trackvaccines.org/vaccines/136/</a> |
| SII B.1.351                                           | Subunit             | Novavax                             | No | Phase 2 | No - Baculovirus  | <a href="https://covid19.trackvaccines.org/vaccines/144/">https://covid19.trackvaccines.org/vaccines/144/</a> |
| SII Bivalent                                          | Subunit             | Novavax                             | No | Phase 2 | No - Baculovirus  | <a href="https://covid19.trackvaccines.org/vaccines/145/">https://covid19.trackvaccines.org/vaccines/145/</a> |
| EuCorVac-19                                           | Subunit             | EuBiologics Co Ltd                  | No | Phase 2 | Awaiting reply    | <a href="https://covid19.trackvaccines.org/vaccines/96/">https://covid19.trackvaccines.org/vaccines/96/</a>   |

|                             |                     |                                                             |    |         |                             |                                                                                                               |
|-----------------------------|---------------------|-------------------------------------------------------------|----|---------|-----------------------------|---------------------------------------------------------------------------------------------------------------|
| QazCoVac-P                  | Subunit             | Research Institute for Biological Safety Problems           | No | Phase 2 | Awaiting reply              | <a href="https://covid19.trackvaccines.org/vaccines/125/">https://covid19.trackvaccines.org/vaccines/125/</a> |
| 202-CoV (aka ZR-202-CoV)    | Subunit             | Shanghai Zerun Biotechnology, Walvax Biotechnology          | No | Phase 2 | No - CHO cells              | <a href="https://covid19.trackvaccines.org/vaccines/138/">https://covid19.trackvaccines.org/vaccines/138/</a> |
| 202a-CoV (aka ZR-202a-CoV)  | Subunit             | Shanghai Zerun Biotechnology, Walvax Biotechnology          | No | Phase 2 | Awaiting reply              | <a href="https://covid19.trackvaccines.org/vaccines/222/">https://covid19.trackvaccines.org/vaccines/222/</a> |
| Recombinant subunit vaccine | Subunit             | St. Petersburg Research Institute of Vaccines and Sera      | No | Phase 2 | Awaiting reply              | <a href="https://covid19.trackvaccines.org/vaccines/175/">https://covid19.trackvaccines.org/vaccines/175/</a> |
| CoVac-1                     | Subunit             | Tuebingen                                                   | No | Phase 2 | No - Chemically synthesized | <a href="https://covid19.trackvaccines.org/vaccines/41/">https://covid19.trackvaccines.org/vaccines/41/</a>   |
| AKS-452X                    | Subunit             | University Medical Center Groningen                         | No | Phase 2 | Awaiting reply              | <a href="https://covid19.trackvaccines.org/vaccines/161/">https://covid19.trackvaccines.org/vaccines/161/</a> |
| COVAC-2                     | Subunit             | University of Saskatchewan                                  | No | Phase 2 | No - Sf9 then CHO cells     | <a href="https://covid19.trackvaccines.org/vaccines/78/">https://covid19.trackvaccines.org/vaccines/78/</a>   |
| Betuvax-CoV-2               | Subunit             | Human Stem Cell Institute Russia                            | No | Phase 2 | No - CHO cells              | <a href="https://covid19.trackvaccines.org/vaccines/194/">https://covid19.trackvaccines.org/vaccines/194/</a> |
| BECOV2D                     | Subunit             | Biological E Limited                                        | No | Phase 2 | No - Yeast                  | <a href="https://covid19.trackvaccines.org/vaccines/57/">https://covid19.trackvaccines.org/vaccines/57/</a>   |
| SCB-2020S                   | Subunit             | Clover                                                      | No | Phase 2 | Awaiting reply              | <a href="https://covid19.trackvaccines.org/vaccines/131/">https://covid19.trackvaccines.org/vaccines/131/</a> |
| BECOV2C                     | Subunit             | Biological E Limited                                        | No | Phase 2 | Awaiting reply              | <a href="https://covid19.trackvaccines.org/vaccines/56/">https://covid19.trackvaccines.org/vaccines/56/</a>   |
| BECOV2B                     | Subunit             | Biological E Limited                                        | No | Phase 2 | Awaiting reply              | <a href="https://covid19.trackvaccines.org/vaccines/55/">https://covid19.trackvaccines.org/vaccines/55/</a>   |
| CIGB-669 (aka Mambisa)      | Subunit             | Center for Genetic Engineering and Biotechnology (CIGB)     | No | Phase 2 | Awaiting reply              | <a href="https://covid19.trackvaccines.org/vaccines/66/">https://covid19.trackvaccines.org/vaccines/66/</a>   |
| RBD SARS-CoV-2 HBsAg VLP    | Virus-like Particle | SpyBiotech                                                  | No | Phase 2 | No - yeast                  | <a href="https://covid19.trackvaccines.org/vaccines/44/">https://covid19.trackvaccines.org/vaccines/44/</a>   |
| SARS-CoV-2 VLP Vaccine      | Virus-like Particle | The Scientific and Technological Research Council of Turkey | No | Phase 2 | No - HEK293 cells           | <a href="https://covid19.trackvaccines.org/vaccines/101/">https://covid19.trackvaccines.org/vaccines/101/</a> |

|                                                             |                     |                                                             |    |         |                         |                                                                                                               |
|-------------------------------------------------------------|---------------------|-------------------------------------------------------------|----|---------|-------------------------|---------------------------------------------------------------------------------------------------------------|
| VBI-2902a                                                   | Virus-like Particle | VBI Vaccines Inc                                            | No | Phase 2 | No - HEK293 cells       | <a href="https://covid19.trackvaccines.org/vaccines/91/">https://covid19.trackvaccines.org/vaccines/91/</a>   |
| SARS-CoV-2 VLP Vaccine Alpha Variant                        | Virus-like Particle | The Scientific and Technological Research Council of Turkey | No | Phase 2 | No - HEK293 cells       | <a href="https://covid19.trackvaccines.org/vaccines/135/">https://covid19.trackvaccines.org/vaccines/135/</a> |
| ACM-001 (aka ACM-SARS-CoV-2-beta ACM-CpG Vaccine Candidate) | Subunit             | ACM Biolabs                                                 | No | Phase 1 | No - insect cell        | <a href="https://covid19.trackvaccines.org/vaccines/207/">https://covid19.trackvaccines.org/vaccines/207/</a> |
| IN-B009                                                     | Subunit             | HK inno.N Corporation                                       | No | Phase 1 | Awaiting reply          | <a href="https://covid19.trackvaccines.org/vaccines/158/">https://covid19.trackvaccines.org/vaccines/158/</a> |
| CoV2-OGEN1                                                  | Subunit             | VaxForm                                                     | No | Phase 1 | Awaiting reply          | <a href="https://covid19.trackvaccines.org/vaccines/121/">https://covid19.trackvaccines.org/vaccines/121/</a> |
| US Army Medical Research and Development Command            | Subunit             | SpFN COVID-19 Vaccine                                       | No | Phase 1 | No - HEK293 cells       | <a href="https://covid19.trackvaccines.org/vaccines/95/">https://covid19.trackvaccines.org/vaccines/95/</a>   |
| COVAC-1                                                     | Subunit             | University of Saskatchewan                                  | No | Phase 1 | No - Sf9 then CHO cells | <a href="https://covid19.trackvaccines.org/vaccines/170/">https://covid19.trackvaccines.org/vaccines/170/</a> |
| DoCo-Pro-RBD-1 (aka DoCo-Pro-RBD-1 + MF59)                  | Subunit             | University of Melbourne                                     | No | Phase 1 | No - HEK293 cells       | <a href="https://covid19.trackvaccines.org/vaccines/192/">https://covid19.trackvaccines.org/vaccines/192/</a> |
| PRIME-2-CoV_Beta                                            | Subunit             | Speransa Therapeutics                                       | No | Phase 1 | No - "mammalian cells"  | <a href="https://covid19.trackvaccines.org/vaccines/205/">https://covid19.trackvaccines.org/vaccines/205/</a> |
| NBP2001                                                     | Subunit             | SK Bioscience Co Ltd                                        | No | Phase 1 | No - Sf9                | <a href="https://covid19.trackvaccines.org/vaccines/90/">https://covid19.trackvaccines.org/vaccines/90/</a>   |
| CoVepiT (aka OSE-13E)                                       | Subunit             | OSE Immunotherapeutics                                      | No | Phase 1 | Awaiting reply          | <a href="https://covid19.trackvaccines.org/vaccines/118/">https://covid19.trackvaccines.org/vaccines/118/</a> |
| GEN2-Recombinant COVID-19 Vaccine (CHO Cells)               | Subunit             | National Vaccine and Serum Institute                        | No | Phase 1 | No - CHO cells          | <a href="https://covid19.trackvaccines.org/vaccines/211/">https://covid19.trackvaccines.org/vaccines/211/</a> |

|                                               |         |                              |    |                    |                      |                                                                                                               |
|-----------------------------------------------|---------|------------------------------|----|--------------------|----------------------|---------------------------------------------------------------------------------------------------------------|
| Baiya SARS-CoV-2 Vax 1 Vaccine                | Subunit | Baiya Phytopharm Co Ltd      | No | Phase 1            | Yes - N. benthamiana | <a href="https://covid19.trackvaccines.org/vaccines/130/">https://covid19.trackvaccines.org/vaccines/130/</a> |
| Baiya SARS-CoV-2 Vax 2 (alternative adjuvant) | Subunit | Baiya Phytopharm Co Ltd      | No | Phase 1            | Yes - N. benthamiana | <a href="https://covid19.trackvaccines.org/vaccines/182/">https://covid19.trackvaccines.org/vaccines/182/</a> |
| PepGNP-SARSCoV2                               | Subunit | Emergex Vaccines Holding Ltd | No | Phase 1            | Awaiting reply       | <a href="https://covid19.trackvaccines.org/vaccines/159/">https://covid19.trackvaccines.org/vaccines/159/</a> |
| IVX-411                                       | Subunit | Icosavax                     | No | Phase 2 - Canceled |                      | <a href="https://covid19.trackvaccines.org/vaccines/124/">https://covid19.trackvaccines.org/vaccines/124/</a> |
| Sclamp (aka Molecular Clamp (Queensland))     | Subunit | Queensland                   | No | Phase 1 - Canceled |                      | <a href="https://covid19.trackvaccines.org/vaccines/21/">https://covid19.trackvaccines.org/vaccines/21/</a>   |
